# Supplementary material for: Flexible and high capacity lithium-ion battery anode based on a carbon nanotube/electrodeposited nickel sulfide paper-like composite
Source: Royal Society of Chemistry journal article supplement (doi:10.1039/c7ra08239h), 2017-01-01
Supplement: c7ra08239h1.pdf [file c7ra08239h1.pdf]

## Supporting Information

### **Flexible and high capacities lithium-ion battery anode based on carbon nanotubes/electrodeposited nickel sulfide paper-like composite**

*Peng Fan*<sup>a</sup>, *Hao Liu*<sup>b,c,d,\*</sup>, *Libing Liao*<sup>a,\*</sup>, *Jinzhou Fu*<sup>a</sup>, *Zhen Wang*<sup>b</sup>, *Guocheng Lv*<sup>a</sup>,  
*Lefu Mei*<sup>a</sup>, *Huiying Hao*<sup>b</sup>, *Jie Xing*<sup>b</sup>, *Jingjing Dong*<sup>b</sup>

<sup>a</sup> School of Materials Science and Technology, China University of Geosciences, Beijing, 100083, P. R. China.

<sup>b</sup> School of Science, China University of Geosciences, Beijing, 100083, P. R. China.

<sup>c</sup> Hubei Key Laboratory of Ferro & Piezoelectric Materials and Devices, Faculty of Physics & Electronic Science, Hubei University, Wuhan, 430062, P.R. China

<sup>d</sup> Beijing Key Laboratory of Optical Detection Technology for Oil and Gas, China University of Petroleum, Beijing, 102249, P. R. China.

Corresponding authors: Hao Liu, Email: [liuhao1398@cugb.edu.cn](mailto:liuhao1398@cugb.edu.cn)

Libing Liao, Email: [lbliao@cugb.edu.cn](mailto:lbliao@cugb.edu.cn)

Tel.: +86-10-8233-1701

Fax.: +86-10-8233-1701

## Figure and Table Captions

**Figure S1.** Rate performance of the CNTs thin film.

**Table S1.** Comparison with other nickel sulfide anode materials reported in literature.

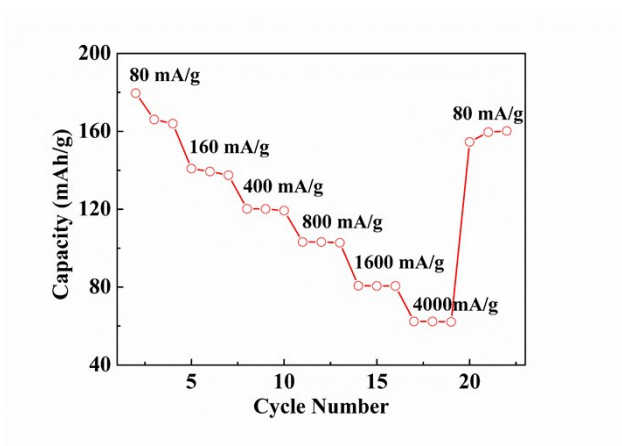

Figure S1. Rate performance of the CNTs thin film.

Table S1. Comparison with other nickel sulfide anode materials reported in literature.

| Materials                                                                   | Synthesis method                            | Flexible | Specific capacities A (mAh/g) <sup>a</sup> | Specific capacities B (mAh/g) <sup>b</sup> |
|-----------------------------------------------------------------------------|---------------------------------------------|----------|--------------------------------------------|--------------------------------------------|
| Carbon nanofiber @NiS <sup>3</sup>                                          | Electrospun                                 | Yes      | 1150 (100 mA/g)                            | unknown                                    |
| Nickel sulfide/nitrogen-doped graphene composites <sup>24</sup>             | Hydrothermal                                | No       | 1340 (140 mA/g)                            | 139 - 300                                  |
| Graphene-wrapped nickel sulfide nanoprisms <sup>23</sup>                    | Chemosynthesis                              | No       | 1200 (70 mA/g)                             | 125 - 270                                  |
| Ni <sub>3</sub> S <sub>2</sub> @N-G (N-doped graphene sheets) <sup>22</sup> | pyrosynthesis                               | No       | 800 (50 mA/g)                              | 83 - 180                                   |
| Ni <sub>3</sub> S <sub>2</sub> /Ni composite <sup>28</sup>                  | Electrodeposition                           | No       | 338 (170 mA/g)                             | 35                                         |
| NiS@SiO <sub>2</sub> /graphene <sup>22</sup>                                | Hydrothermal and electrostatic selfassembly | No       | 867 (100 mA/g)                             | 190.5                                      |
| Ni <sub>3</sub> S <sub>2</sub> nanoflake <sup>15</sup>                      | Hydrothermal                                | No       | 992 (200 mA/g)                             | 160                                        |
| Ni <sub>3</sub> S <sub>2</sub> nanotube Array <sup>14</sup>                 | Template-free hydrothermal                  | No       | 762 (100 mA/g)                             | 127 - 255                                  |
| NS@CNTs (this work)                                                         | Electrodeposition                           | Yes      | 1265 (60 mA/g)                             | 845                                        |

<sup>a</sup> The specific capacities A in terms of the mass of the active material were directly cited from literature.

<sup>b</sup> The specific capacities B were calculated in terms of the total mass of the active materials and the current collector. We supposed the mass of the active material as 2 mg to 5 mg (typical mass loading for 2032-type coin-cell) for the papers which did not give the active material mass. The mass of copper foil current collector was set as ~17.3 mg (10 μm thick and 16 mm in diameter).
